# Patterns of Coral Disease across the Hawaiian Archipelago: Relating Disease to Environment

Greta S. Aeby<sup>1\*</sup>, Gareth J. Williams<sup>2,3\*</sup>, Erik C. Franklin<sup>1</sup>, Jean Kenyon<sup>4</sup>, Evelyn F. Cox<sup>5,6</sup>, Steve Coles<sup>7</sup>, Thierry M. Work<sup>8</sup>

**1** Hawaii Institute of Marine Biology, University of Hawaii, Kaneohe, Hawaii, United States of America, **2** School of Biological Sciences, Victoria University of Wellington, Wellington, New Zealand, **3** Center for Marine Biodiversity and Conservation, Scripps Institution of Oceanography, La Jolla, California, United States of America, **4** Joint Institute for Marine and Atmospheric Research, University of Hawaii, and NOAA Pacific Islands Fisheries Science Center, Honolulu, Hawaii, United States of America, **5** University of Hawaii — West Oahu, Pearl City, Hawaii, United States of America, **6** Hawaii Institute of Marine Biology, Kaneohe, Hawaii, United States of America, **7** Bishop Museum, Honolulu, Hawaii, United States of America, **8** U. S. Geological Survey, National Wildlife Health Center, Honolulu Field Station, Honolulu, Hawaii, United States of America

## Abstract

In Hawaii, coral reefs occur across a gradient of biological (host abundance), climatic (sea surface temperature anomalies) and anthropogenic conditions from the human-impacted reefs of the main Hawaiian Islands (MHI) to the pristine reefs of the northwestern Hawaiian Islands (NWHI). Coral disease surveys were conducted at 142 sites from across the Archipelago and disease patterns examined. Twelve diseases were recorded from three coral genera (*Porites*, *Montipora*, *Acropora*) with *Porites* having the highest prevalence. *Porites* growth anomalies (PorGAs) were significantly more prevalent within and indicative of reefs in the MHI and *Porites* trematodiasis (PorTrm) was significantly more prevalent within and indicative of reefs in the NWHI. *Porites* tissue loss syndrome (PorTLS) was also important in driving regional differences but that relationship was less clear. These results highlight the importance of understanding disease ecology when interpreting patterns of disease occurrence. PorTrm is caused by a parasitic flatworm that utilizes multiple hosts during its life cycle (fish, mollusk and coral). All three hosts must be present for the disease to occur and higher host abundance leads to higher disease prevalence. Thus, a high prevalence of PorTrm on Hawaiian reefs would be an indicator of a healthy coral reef ecosystem. In contrast, the high occurrence of PorGAs within the MHI suggests that PorGAs are related, directly or indirectly, to some environmental co-factor associated with increased human population sizes. Focusing on the three indicator diseases (PorGAs, PorTrm, PorTLS) we used statistical modeling to examine the underlying associations between disease prevalence and 14 different predictor variables (biotic and abiotic). All three diseases showed positive associations with host abundance and negative associations with thermal stress. The association with human population density differed among disease states with PorGAs showing a positive and PorTrm showing a negative association, but no significant explanatory power was offered for PorTLS.

**Citation:** Aeby GS, Williams GJ, Franklin EC, Kenyon J, Cox EF, et al. (2011) Patterns of Coral Disease across the Hawaiian Archipelago: Relating Disease to Environment. PLoS ONE 6(5): e20370. doi:10.1371/journal.pone.0020370

**Editor:** Christian R. Voolstra, King Abdullah University of Science and Technology, Saudi Arabia

**Received:** January 18, 2011; **Accepted:** May 1, 2011; **Published:** May 31, 2011

**Copyright:** © 2011 Aeby et al. This is an open-access article distributed under the terms of the Creative Commons Attribution License, which permits unrestricted use, distribution, and reproduction in any medium, provided the original author and source are credited.

**Funding:** GW was supported by a Victoria University of Wellington (VUW) Vice-Chancellor's Strategic Research Scholarship and a New Zealand International Doctoral Research Scholarship. GA was supported by the Papahānaumokuākea Marine National Monument—Hawaii Institute of Marine Biology MOA. Funding for this research came, in part, from the Hawaii Coral Reef Initiative and the Papahānaumokuākea Marine National Monument—Hawaii Institute of Marine Biology MOA. The funders had no role in study design, data collection and analysis, decision to publish, or preparation of the manuscript.

**Competing Interests:** The authors have declared that no competing interests exist.

\* E-mail: greta@hawaii.edu (GSA); gareth@ucsd.edu (GJW)

## Introduction

Coral disease has emerged as a serious threat to coral reefs worldwide and a major cause of reef deterioration [1]. The numbers of diseases, coral species affected, and the distribution of diseases have all increased dramatically within the last decade [2,3,4,5]. Epizootics of coral disease have resulted in significant losses of coral cover. An outbreak of white band disease in the 1980s killed acroporid corals throughout the Caribbean [6,7], and a recent outbreak of white pox disease in the Florida Keys reduced the cover of *Acropora palmata* by up to 70% [8]. In the Caribbean, coral disease has been implicated as a major factor contributing to the catastrophic decline of coral reefs, resulting in an apparent ecological phase shift from coral to algal-dominated ecosystems [2,4,6,9]. Disease is now emerging as a problem in the Indo-Pacific.

The Australian Institute of Marine Science Long Term Monitoring Program (AIMS LTMP) documented a 22- to 150-fold increase in white syndrome between 1998 and 2003 on the Great Barrier Reef [10]. Coral disease has also been reported from the Philippines [11,12], Indonesia [13], the Marshall Islands and Palau [14], American Samoa [15,16], and the US remote Pacific Island areas [17,18,19].

Disease emerges from a complex interplay between host, agent and environment [20,21,22,23]. Disease prevalence and distribution depends on host distribution, abundance and environmental cofactors [20,21,22,24]. A basic premise of epidemiology is that increased host abundance enhances introduction and maintenance of infectious disease [25,26,27]. Coral disease is no exception with numerous studies finding a relationship between disease prevalence and host abundance [28,29,30,31,32]. Increased anthropo-

genic stress on nearshore environments, overfishing, and environmental conditions associated with global climate change have all been implicated as contributing to increased coral disease [20,21,24]. For example, increases in black-band disease were observed by Antonius [33] in polluted waters near industrialized areas and by Bruckner et al. [34] in areas where high sedimentation and algal overgrowth prevailed. Raymundo et al. [35] found that marine protected areas had higher fish diversity and lower disease prevalence than overfished reefs. Bruno et al. [28] reported that outbreaks of white syndrome in scleractinian corals on the GBR were not only correlated with host abundance but also with warm sea surface temperature anomalies. Increasing local human pressures combined with environmental changes associated with global climate change place coral reefs, worldwide, at risk for collapse. If we are to maintain our coral reef resources then a better understanding is needed of environmental cofactors in occurrence of disease.

Hawaii, is in the unique position of having coral reefs which occur across a wide gradient of biological (host abundance), climatic (sea surface temperature anomalies) and anthropogenic conditions from the heavily human-impacted reefs of the eight, main Hawaiian Islands (MHI) to the relatively pristine reefs of the northwestern Hawaiian Islands (NWHI). The MHI are severely overfished compared to the NWHI [36] and suffer from chronic problems such as coastal development and subsequent terrestrial runoff, coastal pollution from injection wells and sewage spills and human activities associated with tourism and marine recreation [37]. Thus, the Hawaiian archipelago can serve as a 'natural' experiment to examine which factors may be important in influencing patterns of coral disease in the field. Our objectives were to: 1) document the types, frequency of occurrence and prevalence of coral disease across the Hawaiian archipelago, 2) determine whether there were any genus level differences in disease susceptibility in Hawaii, 3) examine whether patterns of disease occurrence differ between regions (MHI vs. NWHI) or within regions (among islands), and 4) focusing on three indicator diseases, use statistical modeling to explore underlying associations between disease prevalence and 14 different predictor variables

(biotic and abiotic) that could affect disease processes or help explain presence of disease.

## Methods

### Study area

The Hawaiian archipelago is one of the most isolated archipelagos in the world spanning over 2,500 km from the island of Hawai'i in the southeast to Kure Atoll in the northwest (Figure 1). It is composed of two regions: the populated eight main Hawaiian Islands (MHI) and the mostly uninhabited islands, atolls and banks of the Northwestern Hawaiian Islands (NWHI). The MHI consists of high volcanic islands with non-structural reef communities and fringing reefs abutting the shore. Approximately 1.2 million people live in the MHI with another nearly seven million tourists visiting Hawaii each year [37]. This large population of residents and visitors has affected the coral reefs of Hawaii through urban development, land-based sources of pollution, overfishing, and recreational overuse. In contrast, the majority of the islands, shoals and atolls within the NWHI are uninhabited, except for Midway, which has been continuously occupied by a limited number of people since 1908, and Kure, Laysan Island, French Frigate Shoals and recently Lisianski, which have been intermittently occupied over the last century. The remoteness and limited reef fishing activities in the NWHI have resulted in significantly reduced anthropogenic impacts to this region as compared to the MHI [37].

### Disease surveys

Surveys were conducted at 78 sites from six different islands within the MHI in 2004 (May, June) and 2005 (February, June, July) and 64 sites from eight different islands/atolls in the NWHI in 2004 (September and October) (Table 1). These surveys were conducted as part of larger multi-agency studies obtaining baseline information on coral reefs throughout the Hawaiian archipelago and so were constrained as to location and timing of the surveys. At each site, two consecutive 25 m lines, separated by approximately 5 m, were deployed along depth contours. Coral colony

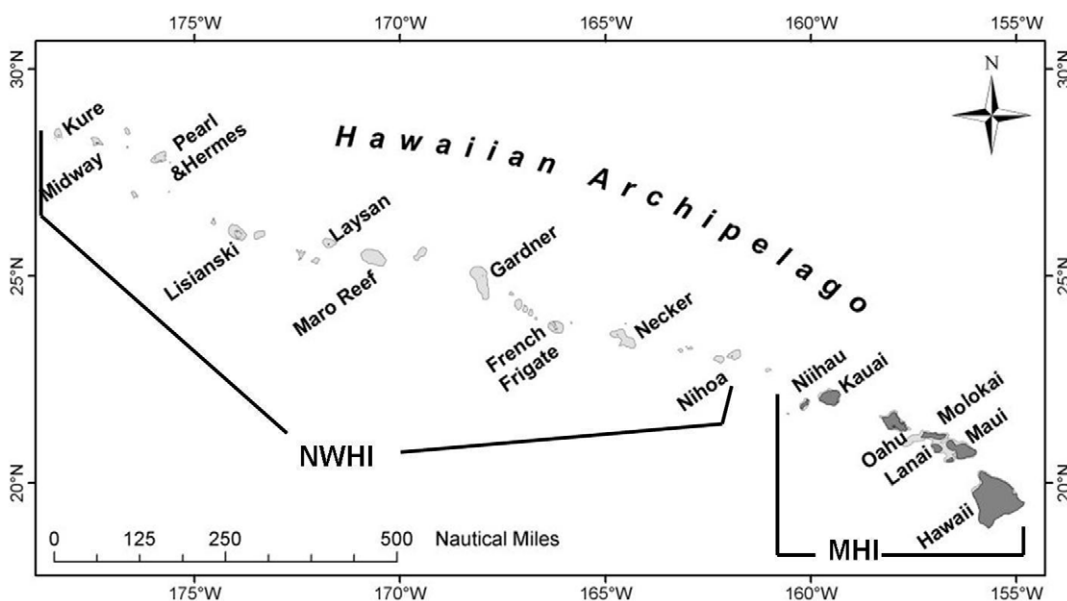

**Figure 1. Map of the Hawaiian archipelago.**  
doi:10.1371/journal.pone.0020370.g001

density was documented along the two 25 m belt transects lines by enumerating all coral colonies whose center fell within 0.5 or 1 meter on either side of the transect line. Coral cover was documented by point-intercept method at 50 cm intervals along both 25-m lines. Disease assessments were conducted along the two belt transects but within a wider 6 meter area (25×6 m). Disease prevalence is relatively low in Hawaii and it was felt that a larger search area (wider belt) was necessary to get a more accurate account of disease presence. Belt length and width were modified as needed to accommodate time constraints underwater and so varied among sites. All coral colonies with lesions were enumerated and photographed, and samples were collected for follow-up histopathological analyses. Lesions were classified as tissue loss, discoloration or growth anomalies and described as per Work and Aeby [38]. These protocols have been used in numerous other studies to document coral cover, community structure and disease within the NWHI [39,40]. From these surveys we documented reef characteristics (depth, coral cover, colony density) as well as differences in disease distribution and prevalence across the archipelago.

### Geospatial Environmental Predictors

Geospatial environmental predictors included frequency of weekly sea surface temperature anomalies (WSSTA) and frequency of erythemal surface ultraviolet (UV) radiation anomalies, while human population size served as a proxy for the impact of anthropogenic effects. Coral disease survey locations were imported as geo-referenced points into the GIS and predictor values were extracted for each survey. Human population counts were raster data of 2.5 arc-minutes resolution adjusted to match UN totals for 2005 [41]. Human population size was summed within circular buffers of 1 and 100 km around each survey site. Data were included for all grid cells that intersected a buffer. The mean annual WSSTA values for the four years prior to the year of

the survey were extracted for each coral survey location. The frequency of weekly sea surface temperature anomalies (WSSTA) was defined as the number of times over the previous 52 weeks that the weekly sea surface temperature (SST) minus the weekly climatological SST, equaled or exceeded 1°C [42]. SSTA data were approximately 4 km resolution Pathfinder AVHRR raster data on a weekly time scale from 1985 through 2005. The frequency of erythemal surface ultraviolet (UV) radiation anomalies were the number of times between 2000 and 2004 that the monthly average exceeded the climatological mean plus one standard deviation [43]. These values were summed across the 12 months to provide a single value, ranging from 0–19, representing the number of anomalous values for each coral survey location over the entire 5 years. The erythemal surface UV data were measured as part of the GSFC TOMS EP/TOMS satellite program at NASA [44]. These data were processed by NASA to isolate the amount of erythemal ultraviolet (UV) light that reaches Earth's surface. Data were reported as the average Joules (J) per m<sup>2</sup> per month at one-degree cell (110 km by 110 km) resolution. All data were prepared and geoprocessed with ArcGIS 9.2 and Matlab 7.1.

### Statistical analyses

Time constraints underwater prevented the enumeration of all coral colonies within the wider belt transects surveyed for disease. Therefore, we estimated the total number of colonies surveyed for disease based upon the mean number of colonies m<sup>-2</sup> found within the narrower (25×0.5 m or 25×1 m) belt transects. Prevalence of disease was defined as the proportion of colonies surveyed that had a particular lesion type. Overall prevalence was the proportion of colonies surveyed that had a particular lesion type with all surveys combined. Frequency of disease occurrence (FOC) was calculated as the percent of sites surveyed having one or more coral colonies manifesting a particular disease state. Disease susceptibility can vary between coral genera so a Chi-square test for equality of distributions was used to examine potential differences between observed prevalence of a disease and expected prevalence based on the abundance of the affected coral genera (each region was examined separately). All calculations for disease prevalence or FOC were done by coral genera (e.g. prevalence of *Porites* trematodiasis = (# infected *Porites* colonies/total # *Porites* colonies surveyed) \* 100).

**Examining disease assemblage patterns (multivariate analyses).** Differences in disease assemblages were investigated using multivariate community analyses. These types of analyses have been a foundation of ecological investigations for many years, although few studies have used them to investigate coral disease patterns (but see [13,30]). Initially, we examined differences in disease assemblages (using raw counts of diseased colonies standardized by survey area as the multivariate response) at two factor levels, Region (NWHI *versus* MHI) and Island (14 islands within the archipelago). Prior to the multivariate analyses, the raw count data were subjected to a dispersion-weighting pre-treatment [45] (analyzed separately for each factor level) to account for any significant levels of spatial clustering for each disease between replicate sub-samples within each *a priori* defined factor (i.e. between islands when analyzing at the Region level, and between transects when analyzing at the Island level). Tests were based on 1000 permutations of the raw data. *Porites* trematodiasis showed the highest levels of spatial clustering. We then used a permutational multivariate analysis of variance (PERMANOVA) [46,47] to test for differences between the two factors, with Island nested within Region. At this stage we did not create factors for either season or year as these were tested as categorical predictors

**Table 1.** Disease surveys conducted in the main and northwestern Hawaiian Islands in 2004 and 2005.

| MHI                   | # sites surveyed | depth range (m) | total area surveyed for disease (m <sup>2</sup> ) |
|-----------------------|------------------|-----------------|---------------------------------------------------|
| Hawaii                | 19               | 7.3–15.2        | 4,978                                             |
| Maui                  | 11               | 2.1–15.2        | 3,150                                             |
| Oahu                  | 27               | 1.5–18.3        | 7,872                                             |
| Kauai                 | 12               | 6.4–17.1        | 3,600                                             |
| Niihau                | 6                | 9.1–15.2        | 1800                                              |
| Lehua                 | 3                | 11.6–15.2       | 900                                               |
| <b>total</b>          | <b>78</b>        |                 | <b>22,300</b>                                     |
| NWHI                  |                  |                 |                                                   |
| French Frigate Shoals | 11               | 1.5–11.3        | 3,000                                             |
| Gardner Pinnacles     | 3                | 12.2–19.5       | 900                                               |
| Maro Reef             | 8                | 10.7–18.3       | 1650                                              |
| Laysan                | 3                | 12.2–14.6       | 750                                               |
| Lisianski             | 9                | 9.1–17.1        | 1800                                              |
| Pearl & Hermes        | 13               | 0.9–15.8        | 3600                                              |
| Midway                | 9                | 0.9–14.3        | 2550                                              |
| Kure                  | 8                | 1.5–14.9        | 2175                                              |
| <b>total</b>          | <b>64</b>        |                 | <b>16,425</b>                                     |

doi:10.1371/journal.pone.0020370.t001

during the modeling stages of the analyses (see below). The PERMANOVA analysis was based on a zero-adjusted Bray-Curtis similarity matrix [48], type III partial sums of squares, and 9999 random permutations of the residuals under the reduced model. PERMANOVA pair-wise interactions were used to identify significant differences in disease assemblages between islands within each region.

To identify indicator diseases between the two regions (those contributing most to the patterns in multivariate space), we used a constrained canonical analysis of principal coordinates (CAP) [49,50]. We calculated Spearman rank correlations of the canonical ordination axes with the original disease variables. Diseases with strong correlations (defined as  $\geq 0.7$  in this study) were then overlaid as a bi-plot. A similarity percentages (SIMPER) analysis [51] was used to identify indicator diseases between islands within each region. SIMPER is not a statistical test, but is useful for initial data exploration.

**Modeling disease-environment associations.** Three regional indicator diseases were identified in the multivariate analyses, which were then modeled against 14 predictor variables (Table 2). Predictor variables included biotic and abiotic variables that could affect disease processes or help explain presence of disease and included coral host abundance, measures of overall coral reef state (coral cover, macroalga cover), potential stressors (weekly sea surface temperature anomalies (WSSTA)), ultraviolet radiation input, local (within 1 km of the site) and regional (within 100 km) human population sizes and variables involved with sampling design, such as month or year of surveys and survey effort. To investigate the association of the abundance of each disease with the predictor variables, we used a permutational distance-based multiple regression technique (DISTLM) [47]. The technique is robust to zero-inflated data sets, such as ours, and makes no assumptions about the distribution of the response variable (normality does not have to be satisfied). No two predictors exceeded an inter-correlation value of 0.75. Predictors were normalized and fitted conditionally in a step-wise manner, with tests based on 9999 permutations of the residuals under the reduced model [47]. Model selection was based on Akaike's

Information Criterion [52] with a second-order bias correction applied (AICc) [53,54]. To interpret the relationship between disease prevalence and the optimal predictor(s), we used distance-based redundancy analysis plots (dbRDA) [47]. We modeled two response variables for each disease: prevalence (proportion of hosts found to be diseased) and diseased colony raw counts. This was to examine for differences between the two model responses but also to allow disease abundance to be standardized against area surveyed (survey effort) in the case of the raw counts. Modeling analyses were based on zero-adjusted Bray-Curtis similarity matrices [48] and conducted in PRIMER v6 [51] and PERMANOVA+ [55]. All models, raw counts/prevalence, were created for each coral disease separately, as recommended by Williams et al. [32].

## Results

### Lesion descriptions and overall disease occurrence across the Hawaiian archipelago

Twelve types of lesions were identified from the 3 coral genera, *Porites*, *Montipora*, and *Acropora*, from across the archipelago (Fig. 2). Eight diseases were documented from reefs within the MHI and 10 diseases from the NWHI with overlap in types of diseases (6 of 12) between regions. Signs of coral disease were widespread occurring at 87.2% of the sites surveyed within the MHI and 80% within the NWHI. Frequency of occurrence varied between diseases with some diseases, such as *Porites* trematodiasis (PorTrm), found archipelago-wide whereas other diseases, such as growth anomalies, found predominantly within one region (MHI) (Table 3). Average prevalence of all diseases, except PorTrm, was low (<1%) (Table 4). The average prevalence of PorTrm across the archipelago was 5.3% (range 0–87%).

### Differences in disease among coral taxa

Coral taxa differed in manifestation of lesions with seven diseases described from *Porites* (PorTrem, PorGA, PorMFTL, PorTL, Por bl w/TL, Por BND, Por DTTD), three from *Montipora* (MontWS, MontMFTL, MontGA) and two from *Acropora*

**Table 2.** Predictor variables used in the modeling analyses with their codes and units.

| Variable                                                  | Code       | Description and units     | Min | Max     |
|-----------------------------------------------------------|------------|---------------------------|-----|---------|
| <i>Porites</i> cover                                      | PorCov     | % cover                   | < 1 | 91      |
| <i>Porites</i> density                                    | PorDen     | # colonies/m <sup>2</sup> | < 1 | 10.4    |
| Overall coral cover                                       | OverallCov | % cover                   | < 1 | 91      |
| Overall coral density                                     | OverallDen | # colonies/m <sup>2</sup> | < 1 | 21      |
| Macroalgae cover                                          | Algae      | % cover                   |     |         |
| Depth                                                     | Depth      | m                         | 1   | 18      |
| WSSTA frequency for survey year                           | WSSTAYr    | number of events          | 0   | 22      |
| WSSTA frequency during prior 4 years prior to survey year | WSSTAfour  | mean number               | 2   | 19      |
| Human numbers within 1 km                                 | HumPop1    | number of people          | 0   | 32,406  |
| Human numbers within 100 km                               | HumPop100  | number of people          | 0   | 954,480 |
| UV input                                                  | UV         | rating scale              | 0   | 10      |
| Month                                                     | Month      | month of survey           | –   | –       |
| Year                                                      | Year       | year of survey            | –   | –       |
| Survey effort                                             | Area       | m <sup>2</sup> of reef    | 150 | 300     |

Min/Max, minimum and maximum predictor values between sites.

doi:10.1371/journal.pone.0020370.t002

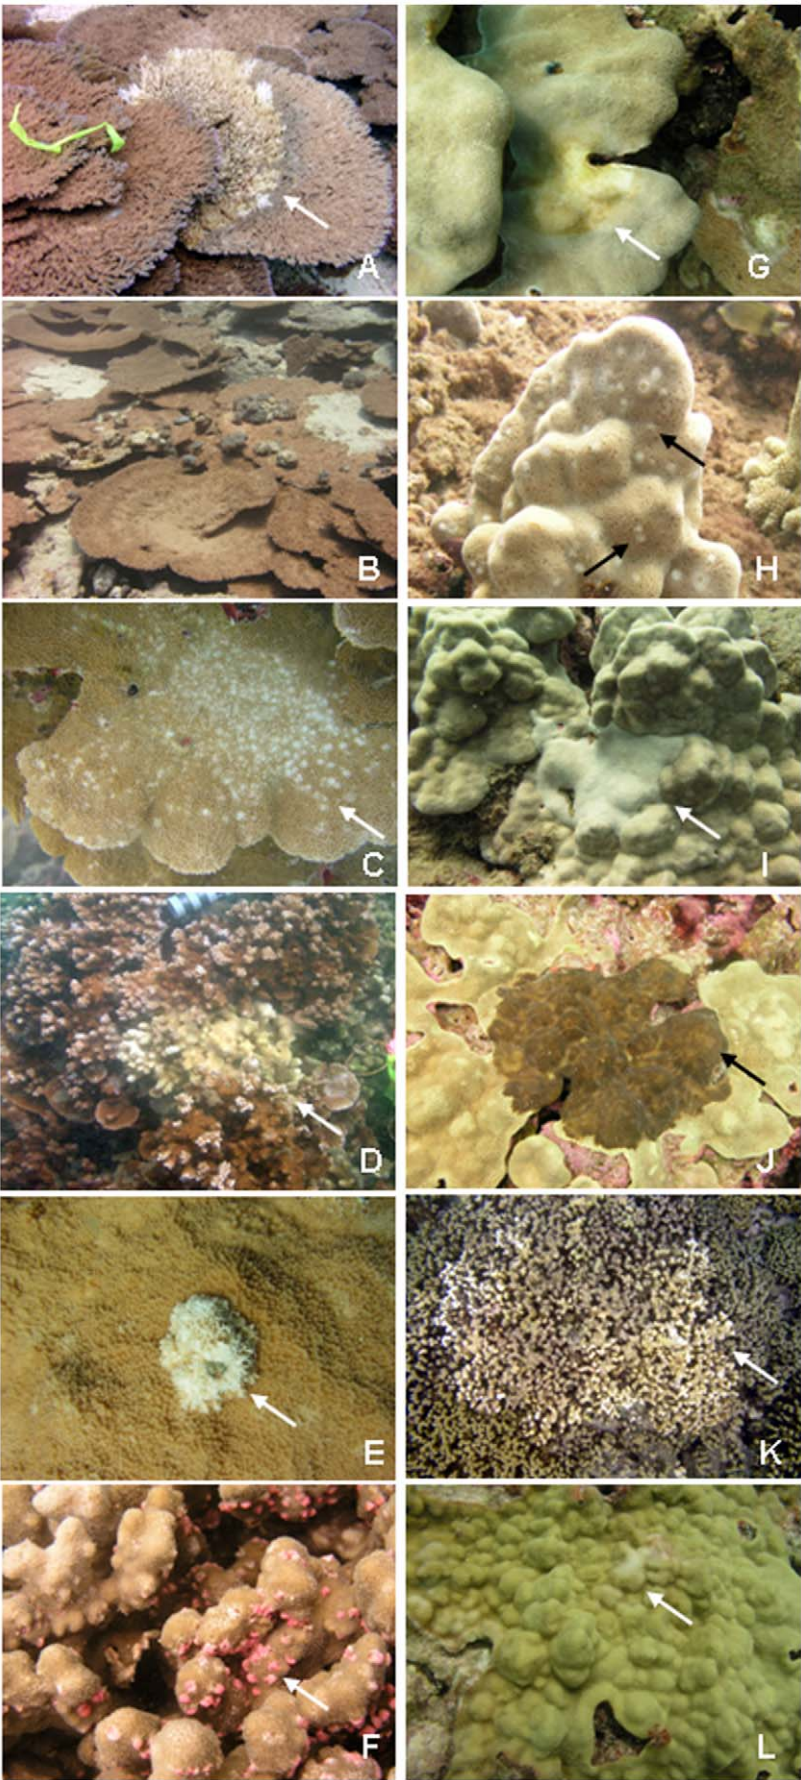

**Figure 2. Photos and description of coral diseases observed during surveys across the Hawaiian archipelago.** All lesions have been characterized histologically and those results will be presented elsewhere. A) *Acropora* white syndrome (AcroWS): diffuse areas of acute to subacute tissue loss, B) *Acropora* growth anomalies (AcroGA): protuberant growths of skeleton accompanied by aberrant calyx formation overlaid by normally pigmented to colorless tissues, C) *Montipora* multifocal tissue loss (MontMFTL): multiple (>5) variably sized areas of acute to subacute tissue loss, D) *Montipora* white syndrome (MontWS): one to 5 areas of acute to subacute tissue loss, E) *Montipora* growth anomalies (MontGA): protuberant growths of skeleton accompanied by aberrant calyx formation overlaid by normally pigmented to colorless tissues, F) *Porites* trematodiasis (PorTrem): multiple small (~5 mm) swollen pink to white nodules, G) *Porites* tissue loss syndrome (PorTLS): one to 5 areas of acute to subacute tissue loss, H) *Porites* multi-focal tissue loss (PorMFTL): multiple (>5) variably sized areas of acute to subacute tissue loss, I) *Porites* growth anomalies (PorGA): protuberant growths of skeleton accompanied by aberrant calyx formation overlaid by normally pigmented to colorless tissues, J) *Porites* brown necrotizing disease (PorBND): diffuse areas of unidentified brown homogenous matrix (not algae) obliterating underlying area of tissue loss and well delineated from surrounding normal tissue, K) *Porites* bleaching with tissue loss (Por bl w/TL): focal areas of bleaching with diffuse areas of acute to subacute tissue loss, L) *Porites* discolored tissue thinning syndrome (PorDTTS): distinct areas of tissue thinning and pallor. Arrows indicate lesions.  
doi:10.1371/journal.pone.0020370.g002

(AcroWS, AcroGA) (Fig. 2). No disease signs were found on *Pocillopora* during these surveys. Prevalence of disease also varied among coral taxa with *Porites* having the highest prevalence and *Pocillopora* the lowest (Fig. 3) and these differences were consistent across regions (MHI:  $\chi^2 = 1184.8$ ,  $df = 2$ ,  $p < 0.001$ ; NWHI:  $\chi^2 = 928.4$ ,  $df = 3$ ,  $p < 0.001$ ).

### Disease assemblage patterns between regions

Disease assemblages differed significantly between regions (*Pseudo-F* = 9.905,  $P = 0.0001$ ), with three diseases, *Porites* trematodiasis (PorTrem), *Porites* growth anomalies (PorGA), and *Porites* tissue loss syndrome (PorTL) contributing most strongly to driving this separation (Fig. 4). Increased levels of PorTrem were associated with the Northwestern Hawaiian Islands (French Frigate Shoals, Kure, Maro, Laysan and Lisianski) and average prevalence of PorTrem was significantly higher in the NWHI ( $10.7 \pm 2.2\%$ ) compared to the MHI ( $1.1 \pm 0.3\%$ ) (Wilcoxon two sample test,  $W = 4756$ ,  $p < 0.001$ ; Table 4). PorGAs were positively associated with the main Hawaiian Islands (Maui, Hawaii, Oahu, and Kauai) and the average prevalence of PorGAs was significantly higher in the MHI ( $0.64 \pm 0.15\%$ ) as compared to

the NWHI ( $0.32 \pm 0.3\%$ ) (Wilcoxon two sample test,  $W = 3177$ ,  $p < 0.001$ ; Table 4). The patterns of PorTLS prevalence were more difficult to interpret but seemed to be positively associated with some islands within the Northwestern Hawaiian Islands (Pearl and Hermes, and to a lesser extent French Frigate Shoals, Kure, Lisianski, Laysan and Maro), but negatively associated with other islands (Midway and Gardner) and the islands of Niuhau and Lehua within the MHI (Fig. 4). Average prevalence of PorTLS did not differ between regions (Wilcoxon two sample test,  $W = 4990$ ,  $p = 0.08$ ; Table 4).

### Disease assemblage patterns within regions

Disease assemblages differed significantly between islands within each region (*Pseudo-F* = 3.208,  $P = 0.0001$ ; Table 5). Within the main Hawaiian Islands, differences in disease assemblages between islands were predominantly driven by PorGAs, with the disease particularly characteristic of Oahu and Maui (Table 6 & Fig. S1). PorTrem was also an influential disease, particularly characteristic of Hawaii (Table 6 & Fig. S1). Within the northwestern Hawaiian Islands, PorTrem was consistently an important indicator disease separating islands (Table 6 & Fig. S2). The disease was particularly characteristic of Laysan and Maro. *Montipora* white syndrome

**Table 3.** Frequency of occurrence (FOC) of different coral diseases within the main and northwestern Hawaiian Islands.

|           | MHI  | NWHI |
|-----------|------|------|
| Por Trem  | 67.5 | 75.4 |
| Por GA    | 59.7 | 4.9  |
| Por TLS   | 22.1 | 32.8 |
| Por bl TL | 9.1  | 0    |
| Por MFTL  | 6.5  | 0    |
| Por DTTS  | 0    | 19.7 |
| Por BND   | 0    | 3.3  |
| Mont GA   | 26.9 | 4.5  |
| Mont WS   | 14.1 | 27.3 |
| Mont MFTL | 14.1 | 11.4 |
| Acro WS   | -    | 33.3 |
| Acro GA   | -    | 22.2 |

FOC represents the proportion of total surveys (%), which contained corals (presence/absence) affected by each particular disease. 78 sites were surveyed within the main Hawaiian Islands and 64 sites surveyed in the northwestern Hawaiian Islands.

Por = *Porites*, Mont = *Montipora*, Acro = *Acropora*, Trem = trematodiasis, GA = growth anomaly, TLS = tissue loss syndrome, MFTL = multi-focal tissue loss, bl = bleaching, DTTS = discolored tissue thinning syndrome, BND = brown necrotizing disease, WS = white syndrome. '-' indicates that particular coral genera was not present in transects.

doi:10.1371/journal.pone.0020370.t003

**Table 4.** Average prevalence of diseases found on the reefs within the main and northwestern Hawaiian Islands.

|           | MHI             | NWHI          |
|-----------|-----------------|---------------|
| Por Trem* | 1.1 (0.3)       | 10.7 (2.2)    |
| Por GA *  | 0.64 (0.15)     | 0.32 (0.3)    |
| Por TLS   | 0.11 (0.03)     | 0.82 (0.28)   |
| Por bl TL | 0.04 (0.03)     | 0             |
| Por MFTL  | 0.006 (0.003)   | 0             |
| Por DTTS  | 0               | 0.31 (0.12)   |
| Por BND   | 0               | 0.02 (0.02)   |
| Mont GA   | 0.06 (0.02)     | 0.009 (0.009) |
| Mont WS   | 0.06 (0.02)     | 0.17 (0.06)   |
| Mont MFTL | 0.0007 (0.0007) | 0.35 (0.2)    |
| Acro WS   | -               | 0.76 (0.4)    |
| Acro GA   | -               | 0             |

78 sites were surveyed within the main Hawaiian Islands and 64 sites surveyed in the northwestern Hawaiian Islands. Standard error in parentheses. \* indicates a significant difference between regions based upon the Wilcoxon two sample test. Por = *Porites*, Mont = *Montipora*, Acro = *Acropora*, Trm = trematodiasis, GA = growth anomaly, TLS = tissue loss syndrome, MFTL = multi-focal tissue loss, bl = bleaching, DTTS = discolored tissue thinning syndrome, BND = brown necrotizing disease, WS = white syndrome. '-' indicates that particular coral genera was not present in transects.

doi:10.1371/journal.pone.0020370.t004

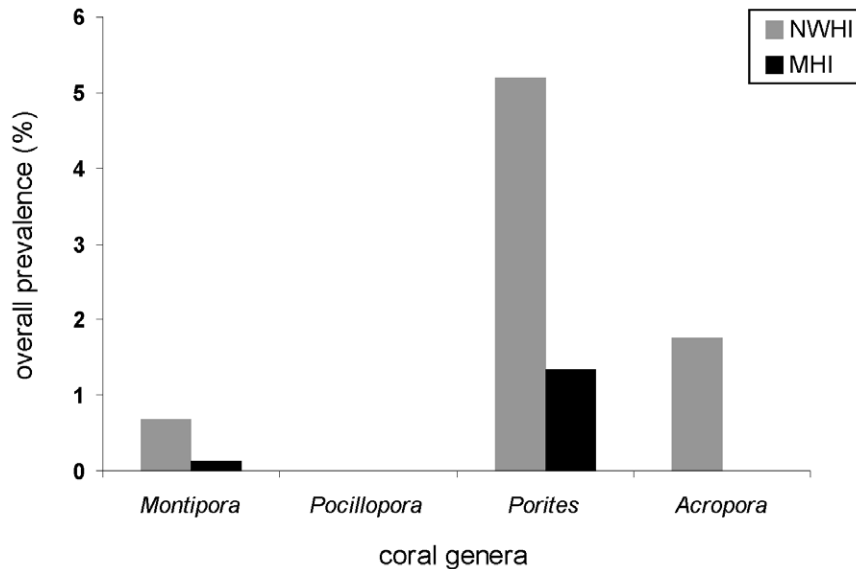

**Figure 3. Differences among coral taxa in disease prevalence across the Hawaiian archipelago.**  
doi:10.1371/journal.pone.0020370.g003

(MontWS) was also an important indicator disease, separating Maro out from the other islands (Table 6 & Fig. S2).

#### Disease-environment associations

**Porites trematodiasis.** PorTrem prevalence was optimally predicted by survey area (explaining 19.4% of the variation in prevalence), with prevalence decreasing as survey area increased (Table 7). However, when the number of cases of PorTrem, were standardized against survey area, *Porites* cover was the optimal predictor (explaining 15.9% of variation in prevalence); with cases of PorTrem positively associated with increases in *Porites* cover. PorTrem prevalence also increased as human population numbers within a 100 km radius decreased and where *Porites* colony densities were reduced (i.e. relatively few, but large colonies present) (Table 7).

**Porites growth anomalies.** PorGA abundance (both prevalence and number of cases) was optimally predicted by the average number of WSSTAs in the four years prior to year of surveying, explaining 14.9% and 16.6% of the variation in the two model responses, respectively (Table 7). PorGA abundance decreased as the mean frequency of WSSTAs increased. PorGA abundance was also higher in shallower depths and was positively associated with overall coral cover, frequency of UV radiation anomalies and human population sizes within a 100 km radius (Table 7).

**Porites tissue loss syndrome.** PorTLS prevalence was optimally predicted by survey area (explaining 16.1% of variation in prevalence), and prevalence decreased as survey area increased (Table 7). When standardized for differences in survey area, the number of cases of PorTLS was positively associated with overall coral cover and negatively associated with the number of WSSTAs during the year of survey, although the predictors explained little of the overall variation (Table 7).

#### Model performance

Model performance varied among diseases. When averaging across models for both disease prevalence and number of cases, PorGA was most effectively modeled (36.9% overall variation explained) and PorTLS least effectively modeled (11.9%). Across

all three diseases and averaging across the two model responses, mean overall explained variability in disease abundance was 26.7% with unexplained variability equaled to 73.3%.

#### Discussion

We surveyed 142 sites from across the Hawaiian archipelago, which spanned a wide range of biotic and abiotic conditions.

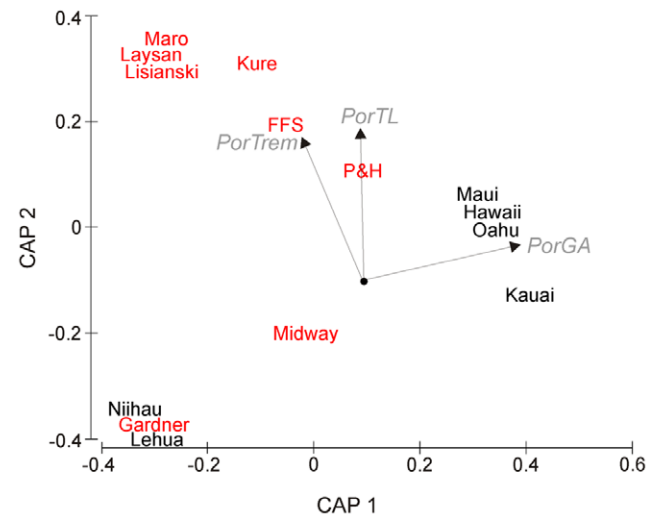

**Figure 4. Constrained CAP ordination of coral disease assemblages for 136 sites at 14 islands across the Hawaiian archipelago.** Group centroids are displayed for each island (MHI – black, NWHI – red). Ordination is based on a zero-adjusted Bray-Curtis coefficient. Bi-plot indicates the disease variables (vectors) exerting the strongest influence on the patterns in multivariate space (in grey). The length and direction of each vector indicates the strength and sign, respectively, of the relationship between that disease variable and the CAP axes. Note that *Acropora* diseases are not included in the analysis. FFS, French Frigate Shoals; P&H, Pearl and Hermes. PorTrem, *Porites* trematodiasis; PorTL, *Porites* tissue loss; PorGA, *Porites* growth anomalies.  
doi:10.1371/journal.pone.0020370.g004

**Table 5.** Average similarity (%) in coral disease assemblages among islands within (a) the Main Hawaiian Islands and (b) the Northwestern Hawaiian Islands.

|     |           |              |              |              |              |              |      |        |
|-----|-----------|--------------|--------------|--------------|--------------|--------------|------|--------|
| (a) | Maui      | 32.0         |              |              |              |              |      |        |
|     | Oahu      | 32.0         | 32.5         |              |              |              |      |        |
|     | Niihau    | <b>32.5*</b> | <b>19.4*</b> | <b>28.5*</b> |              |              |      |        |
|     | Kauai     | 37.6         | <b>31.9*</b> | 35.3         | <b>48.9*</b> |              |      |        |
|     | Lehua     | 34.3         | <b>21.8*</b> | <b>30.1*</b> | 80.6         | 50.3         |      |        |
|     |           | Hawaii       | Maui         | Oahu         | Niihau       | Kauai        |      |        |
| (b) | Gardner   | 44.1         |              |              |              |              |      |        |
|     | Maro      | <b>24.8*</b> | <b>7.6*</b>  |              |              |              |      |        |
|     | Laysan    | 24.7         | 10.9         | 52.4         |              |              |      |        |
|     | Lisianski | <b>27.9*</b> | <b>12.0*</b> | 56.4         | 48.7         |              |      |        |
|     | P&H       | 36.6         | 43.4         | <b>29.2*</b> | 26.1         | <b>28.5*</b> |      |        |
|     | Midway    | 43.4         | 63.7         | <b>11.3*</b> | <b>15.6*</b> | <b>16.8*</b> | 41.4 |        |
|     | Kure      | 30.0         | 34.7         | <b>37.2*</b> | 32.7         | 32.4         | 32.1 |        |
|     |           | FFS          | Gardner      | Maro         | Laysan       | Lisianski    | P&H  | Midway |

\*indicates significantly different from each other ( $P \leq 0.01$ ) using permutational analysis of variance pairwise comparisons. Analyses based on 9999 random permutations. P&H, Pearl and Hermes.  
doi:10.1371/journal.pone.0020370.t005

Twelve different coral diseases were found in three coral genera (*Porites*, *Montipora*, *Acropora*). Reports of diseases with similar field signs have been reported from numerous regions across the Indo-Pacific and include the tissue loss diseases (PorTLS, Por bl w/TL, PorMFTL, MontWS, MontMFTL and AcropWS) and the growth anomalies (PorGA, MontGA, AcropGA) [10,11,13,16,18,29,30,56,57]. Unfortunately, regional comparisons of coral disease are difficult due to differences in nomenclature of coral diseases and

the paucity of information on ecology and etiology of coral diseases [23,38]. For example, several studies report all tissue loss diseases as “white syndrome” regardless of whether the pattern of tissue loss is diffuse, focal, or multi-focal [10,13,18,29,30]. The other difference in manner of reporting diseases is indicating whether or not field signs suggest transmissibility between coral genera (i.e. whether or not there is evidence of disease progression between two adjacent coral colonies from different coral genera).

**Table 6.** Indicator diseases important in explaining differences in disease assemblages among islands within the main and northwestern Hawaiian Islands.

| Region                            | Significant pairwise interaction | Indicator diseases (in order of importance) | Characteristic of |
|-----------------------------------|----------------------------------|---------------------------------------------|-------------------|
| <b>MHI</b>                        | Niihau - Hawaii                  | PorTrem, PorGA, MontGA, PorMFTL             | Hawaii            |
|                                   | Niihau - Maui                    | PorGA, MontGA, PorTrem, MWS                 | Maui              |
|                                   | Niihau - Oahu                    | PorGA, PorTrem, MWS, PorTLS                 | Oahu              |
|                                   | Kauai - Maui                     | PorGA, MontGA, PorTrem, MWS                 | Maui              |
|                                   | Kauai - Niihau                   | PorTrem, PorGA                              | Kauai             |
|                                   | Lehua - Maui                     | PorGA, MontGA, PorTrem, MWS                 | Maui              |
|                                   | Lehua - Oahu                     | PorGA, PorTrem, MWS, PorTLS                 | Oahu              |
|                                   | <b>NWHI</b>                      | Maro - French Frigate Shoals                | PorTrem, MWS      |
| Maro - Gardner                    |                                  | PorTrem, MWS                                | Maro              |
| Lisianski - French Frigate Shoals |                                  | PorTrem                                     | Lisianski         |
| Lisianski - Gardner               |                                  | PorTrem                                     | Lisianski         |
| Pearl & Hermes - Maro             |                                  | PorTrem, MWS                                | Maro              |
| Pearl & Hermes - Lisianski        |                                  | PorTrem                                     | Lisianski         |
| Midway - Maro                     |                                  | PorTrem, MWS                                | Maro              |
| Midway - Laysan                   |                                  | PorTrem                                     | Laysan            |
| Midway - Lisianski                |                                  | PorTrem                                     | Lisianski         |
| Kure - Maro                       |                                  | PorTrem, MWS                                | Maro              |
| Kure - Midway                     | PorTrem                          | Kure                                        |                   |

doi:10.1371/journal.pone.0020370.t006



**Table 7.** Summary results of a distance-based permutational multiple regression analysis for the association of three coral diseases with 14 predictor variables across 134 sites throughout the Hawaiian archipelago.

| Response   | Disease | Predictor            | AICc       | Pseudo-F | P value | % variability | % total | Relationship |
|------------|---------|----------------------|------------|----------|---------|---------------|---------|--------------|
| Prevalence | PorTrem | Area                 | 959.90     | 32.057   | 0.0001  | 19.4          |         | negative     |
|            |         | PorCov               | 951.11     | 11.088   | 0.0002  | 6.2           |         | positive     |
|            |         | HumPop100            | 937.44     | 5.5827   | 0.0002  | 5.4           |         | negative     |
|            |         | PorDen               | 935.66     | 2.228    | 0.0043  | 2.8           | 33.8    | negative     |
| Counts     | PorTrem | <i>Porites</i> cover | 761.40     | 25.163   | 0.0001  | 15.9          |         | positive     |
|            |         | WSSTA 4 yr           | 750.11     | 13.754   | 0.0001  | 7.9           |         | unclear      |
|            |         | WSSTA                | 742.03     | 10.283   | 0.0010  | 5.5           | 29.3    | negative     |
| Prevalence | PorGA   | WSSTA 4 yr           | 750.68     | 23.17    | 0.0001  | 14.9          |         | negative     |
|            |         | Depth                | 745.11     | 10.775   | 0.0005  | 5.7           |         | negative     |
|            |         | UV                   | 728.91     | 7.7012   | 0.0038  | 4.7           |         | unclear      |
|            |         | OverallCov           | 739.68     | 7.5454   | 0.0042  | 4.4           |         | positive     |
|            |         | WSSTAyr              | 737.55     | 4.1955   | 0.0310  | 2.4           |         | negative     |
|            |         | HumPop100            | 722.75     | 4.6514   | 0.0229  | 2.3           | 34.4    | positive     |
|            |         | Counts               | WSSTA 4 yr | 480.93   | 26.301  | 0.0001        | 16.6    |              |
| Counts     | PorGA   | UV                   | 470.99     | 12.305   | 0.0006  | 7.2           |         | positive     |
|            |         | Overall coral cover  | 464.43     | 8.7022   | 0.0035  | 4.8           |         | positive     |
|            |         | Depth                | 452.5      | 9.7621   | 0.0012  | 4.8           |         | negative     |
|            |         | WSSTAyr              | 460.15     | 6.349    | 0.0113  | 3.4           |         | unclear      |
|            |         | Humans 100 km        | 445.5      | 5.3499   | 0.0210  | 2.5           | 39.3    | positive     |
|            |         | Prevalence           | PorTL      | Area     | 754.58  | 25.344        | 0.0001  | 16.1         |
| Counts     | PorTL   | Overall coral cover  | 379.28     | 6.6851   | 0.0107  | 4.5           |         | positive     |
|            |         | WSSTAyr              | 376.68     | 4.6629   | 0.0311  | 3.1           | 7.6     | negative     |

Two response variables are modeled for each disease; prevalence and the number of disease cases. The optimal predictors of each response and the proportion of variability in the data set they explained (% variability) are shown. Where possible, the relationship between the response and predictor is displayed. Model development was based on step-wise selection and Akaike's Information Criterion with a second-order bias correction applied (AICc), with the total variation explained ( $r^2$ ) by each model shown (% total). Analyses based on 9999 permutations of the residuals under a reduced model.  
doi:10.1371/journal.pone.0020370.t007

In some field studies, disease can be found progressing from one colony to others regardless of coral genera and so those could be considered non-host specific "white syndromes" (Dalton and Smith 2006, pers. obs.). In contrast, in Hawaii diseased colonies have been observed adjacent and touching healthy colonies of a different genus with no disease transmission ever apparent. Given these field signs, it is more informative to include the host genus in the disease name (e.g. *Acropora* white syndrome) [38].

Surveys also only offer a snapshot in the progression of diseases and so limit accurate disease diagnosis. For example, we found *Porites* multi-focal tissue loss, which has disease signs similar to *Porites* ulcerative white spot disease (PUWS) described from reefs in the Philippines [58]. However, we did not follow disease progression to determine whether it was consistent with PUWS or conduct follow-up laboratory analyses, which would be required to properly identify PUWS.

In general, the average prevalence of diseases on reefs within the Indo-Pacific are low [10,11,13,17,18,19,40], which is consistent with our findings for disease, excluding PorTrm, on corals within the Hawaiian archipelago. However, some coral diseases, such as PorTrm, can be quite prevalent in the Indo-Pacific at the local level. We found PorTrm, the most common and prevalent disease in Hawaii, averaged 5.3% (range = 0 to 87%). Within the Philippines, Kaczmarek [12] reported PUWS in up to 53.7% of the *Porites* colonies surveyed. In Guam, Myers and Raymundo [29] reported the average prevalence of white syndrome to be 8.9%

(range = 0–26.3%) and PUWS averaged 2.8% prevalence (range = 0–17.4%).

Similar to several studies across the Indo-Pacific differential disease susceptibilities were found among coral taxa. *Porites* is the dominant coral on the reefs of the Hawaiian archipelago comprising 63.5% of the overall coral community within transects (data not shown). Accordingly, in both regions *Porites* had the highest number, widest distribution, and highest prevalence of diseases as compared to other coral taxa. Kaczmarek [12] found high levels of disease in *Porites* in the Philippines where *Porites* is also the dominant coral. *Acropora*, although a small component of the Hawaiian coral reef community, had the second highest prevalence of disease among coral taxa. This is consistent with other studies, which have found *Acropora* to be especially vulnerable to disease in many regions of the Indo-Pacific [10,13,40,59] as well as the Western Atlantic [7,8,60,61]. In contrast, no signs of disease were found in *Pocillopora* in either region, MHI or NWHI. The Australian GBR is a region where pocilloporids are a small component of the coral community, yet have high disease prevalence [10]. Interestingly, skeletal eroding band is the most prevalent disease on *Pocillopora* on the GBR and while this disease was reported once from Hawaii based on presence of ciliates on bare coral skeleton [62] it has not been verified using observational data (evidence of disease progression) or histological techniques.

The effect of environmental stress on the dynamics of infectious disease can vary depending on the underlying host-pathogen-stress

dynamics [22]. For example, if an environmental stress reduces host abundance below a threshold level then disease prevalence may decline. Conversely, if the stress compromises the host increasing its susceptibility to disease, then prevalence might increase. Accordingly, we found distinct regional differences when the disease assemblage patterns were examined across the archipelago. PorGAs were significantly more prevalent within and indicative of the human-impacted reefs of the MHI but PorTrm was reduced within the MHI. Instead, PorTrm was significantly more prevalent within and indicative of the pristine reefs of the NWHI. PorTLS was also found to be important in driving the regional differences, although that relationship was less clear. These results, although surprising and unexpected, highlight the importance of understanding disease ecology when interpreting patterns of disease occurrence.

PorTrm is caused by the digenetic trematode, *Podocotyloides stenometra* Pritchard [63,64,65]. *P. stenometra* has a complex life cycle involving a first intermediate host thought to be a mollusk, *Porites* as the second intermediate host, and coral-feeding fish as the final host [64]. Completion of the parasite's life cycle occurs when coral-feeding fish ingest the infected polyp, with the adult worm subsequently residing in the guts of fish [64]. Multiple species of coral-feeding reef fish can serve as host to the parasite [64,66]. As such, occurrence of this disease on the reefs requires the presence of all three of its hosts (mollusk, coral and fish) and so presumably, a healthier ecosystem supporting a greater diversity of vertebrate and invertebrate hosts would, in turn, support a greater abundance of their parasites [67]. Using statistical modeling, we found PorTrm, when survey area was controlled for, showed strong positive associations with host abundance (% cover), consistent with other studies [32,68] and a negative association with human population size. The NWHI is a healthier ecosystem than the MHI [69] and has a higher abundance and diversity of reef fish. Friedlander and DeMartini [36] found the mean fish standing stock to be 260% higher in the NWHI as compared to the MHI, and butterflyfish are thought to be the main vector transmitting PorTrm across the reefs [68]. We suggest that environmental conditions within the MHI, which also affect host abundances, are not conducive to widespread transmission of this parasite, a phenomenon similar to that noted by others where environmental degradation is associated with reduced parasite diversity [67]. The pattern of increased PorTrm in healthier ecosystems was also documented in Kaneohe Bay where southern reefs, heavily impacted by runoff [70], had significantly lower levels of PorTrm than relatively cleaner northern reefs [68]. Whereas for many coral diseases, stressors clearly play a role in increasing disease levels, this does not hold true for PorTrm. In fact, a high prevalence of PorTrm on Hawaiian reefs appears to be indicative of a comparatively healthier coral reef ecosystem. Fortunately, PorTrm is a chronic disease that, although it reduces coral growth [71,72], does not usually result in colony mortality. Interestingly, the model also showed a negative association between PorTrm prevalence and size of area surveyed (e.g. the larger the area surveyed the lower the overall prevalence of PorTrm) and this is probably due to the spatially clumped nature of PorTrm infections [68].

In contrast, PorGAs were strikingly more common and prevalent within the MHI suggesting that this disease could be affected by environmental conditions associated with human presence. Kaczmarek [12] reported a high prevalence of PorGAs (up to 39.1%) in the Philippines, a region that contains some of the most impacted reefs in the world [73]. The etiology of GAs is unknown, however Kaczmarek and Richardson [74], through controlled experiments, found that growth anomalies in *Porites*

might be transmissible. Little else is known about the ecology of PorGAs making interpretation of these patterns challenging. However, we found PorGAs prevalence showed positive associations with overall coral cover, the frequency of UV anomalies and human population size. Aeby et al. [75] examined PorGAs from 13 regions across the Indo-Pacific and found that prevalence of PorGAs was strongly host density-dependent and also showed strong positive associations with human population size. Our study adds to the growing body of evidence that suggests that PorGAs are related, directly or indirectly, to some environmental co-factor associated with increased human population size at local and regional spatial scales. The underlying mechanism influencing the association between PorGAs and human density is unclear and warrants further investigation.

Other hypotheses have been proposed to explain the distribution of coral growth anomalies. Damage to cells from ultraviolet radiation was suggested as a potential mechanism contributing to formation of GAs in *Acropora* [76]. However, Stimson [77] found no effect of UV exposure on the development of GAs on *Porites compressa* in Hawaii. We found a negative association between PorGAs and depth, which is consistent with other studies [32,78], and a positive association with UV. However, other environmental variables can also vary with depth or in areas with higher UV exposure. For example, corals on a shallow reef as compared to a deeper reef usually experience higher water motion, UV exposure, ambient light and greater temperature fluctuations. The ecological mechanisms behind these disease-environment patterns are likely to be complex and could be the result of direct or indirect associations. A better understanding of disease etiology should help in the interpretation of these patterns and should be the focus of future studies. Regardless of the underlying drivers, the high prevalence of PorGAs within the MHI is a concern. Growth anomalies have been linked to reduced growth in affected corals [79], a reduction in the amount of lipids [80], reduced reproduction [57,80] and an impaired ability to withstand bleaching stress [81]. As such, more research is needed to understand the effects of growth anomalies on coral populations in Hawaii. Understanding disease processes becomes especially important in light of predictions of increased severity and frequency of coral bleaching associated with global climate change [28] and continual increases in local stressors on the reefs of Hawaii.

PorGAs and PorTrem were also found to be important in explaining differences among disease assemblages between islands within regions. Within the MHI, Oahu and Maui stand out as the most affected by disease with PorGAs especially prevalent. Not surprisingly, Oahu and Maui also contain the highest human population densities (567/km<sup>2</sup> and 62/km<sup>2</sup>, respectively) as compared to the other islands (Kauai: 41/km<sup>2</sup>, Hawaii: 14/km<sup>2</sup>, Niihau: 1/km<sup>2</sup>, Lehua: 0/km<sup>2</sup>) (<http://geonames.usgs.gov>). PorTrm was more characteristic of Kauai and Hawaii, which have lower human densities and host abundance adequate to maintain disease in the population. Niihau and Lehua have few human influences but also low (<1%) coral cover (host abundance) and accordingly low disease prevalence. Within the NWHI where human influences are minimal, PorTrem was the main disease underlying differences in disease assemblages among islands and was especially prevalent on Maro, Lisianski, Laysan and Kure. This study, as well as others, have found host abundance to be an important factor affecting PorTrem prevalence and this may help explain disease differences among islands as Maro and Lisianski have the highest coral cover among islands (avg. 40.7% and 38.3%, respectively) (Fig. S3). However, neither Laysan (avg. 16.4%) nor Kure (avg. 12.8%) had high abundance of coral cover,

suggesting other factors not considered in this model may also be important. Coral-feeding reef fish have been suggested as a vector for PorTrem [68] and therefore abundance of coral-feeding reef fish could also affect disease prevalence and should be considered in future studies.

Maro and Midway had the highest prevalence of *Montipora* white syndrome (MontWS) within the archipelago. MontWS was found to be host density dependent in Kaneohe Bay, Oahu [31] and the sites we surveyed at Maro and Midway contained some of the highest cover of *Montipora* within the NWHI (Fig. S3). However, Williams et al. [32] also found MontWS was positively associated with chlorophyll-*a* concentrations, which would be indicative of poor water quality. Water clarity is reduced at Maro as the structure of Maro is complex (combination of linear and patch reefs) which allows wave energy to penetrate lagoonal water, which keeps fine sediments suspended in the water column [39], another stressor that may explain the higher occurrence of MontWS on Maro's reefs. At Midway, montiporids are found almost exclusively in the backreefs [82], which suffered severe bleaching in 2002 [83] and again in 2004 [84]. For MontWS, host abundance and coral stress may both be contributing to disease prevalence.

Coral diseases, like most diseases, display complex association with their environment because of the intricate nature of the host-environment-agent triad and the inherent multi-collinearity present between biotic and abiotic variables in any ecological system [20,32,38,85]. Not surprisingly, using statistical modeling we found similarities and differences among the three indicator diseases with respect to potential underlying drivers. All three diseases showed positive associations with measures of host abundance (*Porites* cover and overall coral cover) which is consistent with infectious disease ecology theory [85]. Many examples of relationships between host abundance and disease prevalence exist throughout a wide range of ecosystems including coral disease [28,29,31,32,75]. All three diseases were also consistent in showing a negative association with WSSTA, which contrasts with other coral disease studies that have found a positive association between coral disease and thermal stress [28,86,87,88]. It may be that chronic diseases, such as GAs or Trematodiasis are less influenced by temperature when compared to the tissue loss diseases, many of which are caused by pathogenic bacteria with virulence factors that may be enhanced at higher temperatures [8,14,89,90]. Aeby et al. [75] also found no association between WSSTAs and prevalence of *Acropora* and *Porites* growth anomalies across the Indo-Pacific. However, we also found a negative association between WSSTAs and PorTLS. Nothing is known about the etiology or pathogenesis of PorTLS making interpretation of these associations difficult but not all tissue loss diseases necessarily respond to temperature stress. Aeby et al. [31] found no evidence of seasonality in the tissue loss disease, MontWS, in Hawaii. However, they hypothesized that evidence of seasonality could have been obscured by different stresses in each respective season (e.g. temperature stress in summer months and heavy rainfall and the associated stress of terrestrial run-off in winter months). Differences in underlying associations among the three indicator diseases also occurred with human population size, with a positive association with PorGA and a negative association with PorTrm but no significant explanatory power for PorTLS. Clearly disease processes are complex and our results are consistent with the idea that different coral diseases can show distinct associations with multiple environmental factors [32,75]. We also found that the overall unexplained variability in disease abundance among the three indicator diseases was high (a mean of 73.3% across all three diseases) suggesting that much more research is needed in understanding the pathogenesis of these diseases.

Regardless of the underlying drivers, this study did find strong patterns of disease occurrence with PorGAs common in the MHI whereas PorTrm was more prevalent in the NWHI. This finding demonstrates the value of examining prevalence of individual diseases rather than combining diseases together. For example, if this study had combined all diseases together, then the average disease prevalence would be higher on the near-pristine reefs of the NWHI as compared to the impacted reefs of the MHI. However, this pattern is skewed by the high prevalence of a single disease, PorTrm, which has a lower prevalence in human impacted regions.

## Supporting Information

**Figure S1 Frequency of occurrence (FOC) and prevalence of different coral diseases among islands within the main Hawaiian Islands.** Standard error in parentheses. Por = *Porites*, Mont = *Montipora*, Trm = trematodiasis, GA = growth anomaly, TLS = tissue loss syndrome, MFTL = multi-focal tissue loss, BI = bleaching, WS = white syndrome = tissue loss. (DOC)

**Figure S2 Frequency of occurrence (FOC) and prevalence of different coral diseases among islands within the northwestern Hawaiian Islands.** Standard error in parentheses. Por = *Porites*, Mont = *Montipora*, Acro = *Acropora*, Trm = trematodiasis, GA = growth anomaly, TLS = tissue loss syndrome, MFTL = multi-focal tissue loss, WS = white syndrome = tissue loss, DTTS = discolored tissue thinning syndrome, BND = brown necrotizing disease, FFS = French Frigate Shoals, GAR = Gardner Pinnacles, PHR = Pearl and Hermes Atoll. ‘-’ indicated that particular coral genera was not present within the transects. (DOC)

**Figure S3 Average coral cover of dominant coral genera from surveys in the main and northwestern Hawaiian Islands.** Standard error in parentheses. FFS = French Frigate Shoals, GAR = Gardner Pinnacles, PHR = Pearl and Hermes Atoll. Coral cover determined by point-intercept method. ‘\*’ indicates that coral was present within the belt transect but did not occur underneath the transect line so was not recorded by the point-intercept method. (DOC)

## Acknowledgments

We thank the officers and crew of the NOAA ships *Oscar Elton Sette* and *H'ialakai*, for logistic support and field assistance. The Coral Reef Temperature Anomaly Database (CoRTAD) was developed by the NOAA National Oceanographic Data Center and the University of North Carolina, Chapel Hill. It was provided by the NOAA National Oceanographic Data Center at <http://www.nodc.noaa.gov/Satellite-Data/Cortad/>. Human population data was provided by the Center for International Earth Science Information Network (CIESIN), Columbia University; United Nations Food and Agriculture Programme (FAO); and Centro Internacional de Agricultura Tropical (CIAT) with funding from the National Aeronautics and Space Administration under Contract NAS5-03117 for the Continued Operation of the Socioeconomic Data and Applications Center (SEDAC). This manuscript was greatly improved by input from two anonymous reviewers.

## Author Contributions

Conceived and designed the experiments: GA. Performed the experiments: GA TW SC EC JK. Analyzed the data: GW EF GA. Contributed reagents/materials/analysis tools: GA TW SC EC JK GW EF. Wrote the paper: GA TW SC EC JK GW EF.

## References

- Weil E, Smith G, Gil-Agudelo DL (2006) Status and progress in coral reef disease research. *Diseases of Aquatic Organisms* 69: 1–7.
- Porter JW, Dustan P, Jaap WC, Patterson KL, Kosmynin V, et al. (2001) Patterns of spread of coral disease in the Florida Keys. *Hydrobiologia* 460: 1–24.
- Green EP, Bruckner AW (2000) The significance of coral disease epizootiology for coral reef conservation. *Biological Conservation* 96: 347–361.
- Sutherland KP, Porter JW, Torres C (2004) Disease and immunity in Caribbean and Indo-Pacific zooxanthellate corals. *Marine Ecology-Progress Series* 266: 273–302.
- Weil E (2004) Coral disease in the wider Caribbean. In: Rosenberg E, Loya Y, eds. *Coral health and disease*: Springer-Verlag. pp 35–68.
- Aronson RB, Precht WF (2001) White-band disease and the changing face of Caribbean coral reefs. *Hydrobiologia* 460: 25–38.
- Gladfelter WB (1982) White-band disease in *Acropora palmata*: implications for the structure and growth of shallow reefs. *Bulletin of Marine Science* 32: 639–643.
- Patterson KL, Porter JW, Ritchie KE, Polson SW, Mueller E, et al. (2002) The etiology of white pox, a lethal disease of the Caribbean elkhorn coral, *Acropora palmata*. *Proceedings of the National Academy of Sciences of the United States of America* 99: 8725–8730.
- Hughes TP (1994) Catastrophes, phase-shifts, and large-scale degradation of a Caribbean coral reef. *Science* 265: 1547–1551.
- Willis BL, Page CA, Dinsdale EA (2004) Coral disease on the Great Barrier Reef. In: Rosenberg E, Loya Y, eds. *Coral Health and Disease*. Berlin: Springer-Verlag. pp 69–104.
- Raymundo IJ, Rosell KB, Reboton CT, Kaczmarek L (2005) Coral diseases on Philippine reefs: genus *Porites* is a dominant host. *Diseases of Aquatic Organisms* 64: 181–191.
- Kaczmarek LT (2006) Coral disease dynamics in the central Philippines. *Diseases of Aquatic Organisms* 69: 9–21.
- Haapkyla J, Seymour AS, Trebilco J, Smith D (2007) Coral disease prevalence and coral health in the Wakatobi Marine Park, south-east Sulawesi, Indonesia. *Journal of the Marine Biological Association of the United Kingdom* 87: 403–414.
- Sussman M, Willis BL, Victor S, Bourne DG (2008) Coral pathogens identified for white syndrome (WS) epizootics in the Indo-Pacific. *PLoS ONE* 3: e2393.
- Work TM, Rameyer RA (2005) Characterizing lesions in corals from American Samoa. *Coral Reefs* 24: 384–390.
- Acby GS, Work TM, Fenner D, Didonato E (2009) Coral and crustose coralline algae disease on the reefs of American Samoa. Ft. Lauderdale Florida: Proceedings of the 11th International Coral Reef Symposium. pp 197–201.
- Williams GJ, Acby GS, Davy SK (2008) Coral disease at Palmyra Atoll, a remote reef system in the Central Pacific. *Coral Reefs* 27: 207–207.
- Vargas-Angel B (2009) Coral health and disease assessment in the US Pacific Remote Island Areas. *Bulletin of Marine Science* 84: 211–227.
- Williams GJ, Knapp IS, Acby GS, Davy SK (2011) Spatial and temporal patterns of scleractinian coral, soft coral, and zoanthid disease on a remote, near-pristine coral reef (Palmyra Atoll, central Pacific). *Diseases of Aquatic Organisms* 94: 89–100.
- Harvell CD, Mitchell CE, Ward JR, Altizer S, Dobson AP, et al. (2002) Ecology - Climate warming and disease risks for terrestrial and marine biota. *Science* 296: 2158–2162.
- Harvell D, Jordan-Dahlgren E, Merkel S, Rosenberg E, Raymundo L, et al. (2007) Coral disease, environmental drivers, and the balance between coral microbial associates. *Oceanography* 20: 172–195.
- Lafferty KD, Holt RD (2003) How should environmental stress affect the population dynamics of disease? *Ecology Letters* 6: 654–664.
- Work TM, Richardson LL, Reynolds TL, Willis BL (2008) Biomedical and veterinary science can increase our understanding of coral disease. *Journal of Experimental Marine Biology and Ecology* 362: 63–70.
- Harvell CD, Kim K, Burkholder JM, Colwell RR, Epstein PR, et al. (1999) Review: Marine ecology - Emerging marine diseases - Climate links and anthropogenic factors. *Science* 285: 1505–1510.
- Anderson R, May R (1979) Population biology of infectious diseases: Part 1. *Nature* 280: 361–367.
- Antonovics J, Iwasa Y, Hassell M (1995) A generalized model of parasitoid, venereal, and vector-based transmission processes *American Naturalist* 145: 661–665.
- Mitchell C, Tilman D, Groth J (2002) Effects of grassland plant species diversity, abundance, and composition on foliar fungal disease. *Ecology* 83: 1713–1726.
- Bruno JF, Selig ER, Casey KS, Page CA, Willis BL, et al. (2007) Thermal stress and coral cover as drivers of coral disease outbreaks. *PLoS Biology* 5: 1220–1227.
- Myers RL, Raymundo IJ (2009) Coral disease in Micronesian reefs: a link between disease prevalence and host abundance. *Diseases of Aquatic Organisms* 87: 97–104.
- Haapkyla J, Unsworth RKF, Seymour AS, Melbourne-Thomas J, Flavell M, et al. (2009) Spatio-temporal coral disease dynamics in the Wakatobi Marine National Park, South-East Sulawesi, Indonesia. *Diseases of Aquatic Organisms* 87: 105–115.
- Acby GS, Ross M, Williams GJ, Lewis TD, Work TM (2010) Disease dynamics of *Montipora* white syndrome within Kaneohe Bay, Oahu, Hawaii: distribution, seasonality, virulence, and transmissibility. *Diseases of Aquatic Organisms* 91: 1–8.
- Williams GJ, Acby GS, Cowie ROM, Davy SK (2010) Predictive Modeling of Coral Disease Distribution within a Reef System. *PLoS ONE* 5: e2924.
- Antonius A (1988) Black Band disease behavior on Red Sea reef corals. Townsville, Australia: Proceedings of the 6th International Coral Reef Symposium. pp 145–150.
- Bruckner AW, Bruckner RJ, Williams EH (1997) Spread of a black-band disease epizootic through the coral reef system in St Ann's Bay, Jamaica. *Bulletin of Marine Science* 61: 919–928.
- Raymundo IJ, Halford AR, Maypa AP, Kerr AM (2009) Functionally diverse reef-fish communities ameliorate coral disease. *Proceedings of the National Academy of Sciences of the United States of America* 106: 17067–17070.
- Friedlander AM, DeMartini EE (2002) Contrasts in density, size, and biomass of reef fishes between the northwestern and the main Hawaiian islands: the effects of fishing down apex predators. *Marine Ecology-Progress Series* 230: 253–264.
- Friedlander AM, Acby G, Brainard R, Brown E, Chaston K, et al. (2008) The state of coral reef ecosystems of the Main Hawaiian Islands. In: Waddell J, ed. *The State of Coral Reef Ecosystems of the United States and Pacific Freely Associated States*: NOAA Technical Memorandum NOS NCCOS 11 NOAA/NCCOS Center for coastal monitoring and assessment's biogeography team. pp 219–261.
- Work TM, Acby GS (2006) Systematically describing gross lesions in corals. *Diseases of Aquatic Organisms* 70: 155–160.
- Kenyon JC, Vroom PS, Page KN, Dunlap MJ, Wilkinson CB, et al. (2006) Community structure of hermatypic corals at French Frigate Shoals, Northwestern Hawaiian Islands: Capacity for resistance and resilience to selective stressors. *Pacific Science* 60: 153–175.
- Acby GS (2006) Baseline levels of coral disease in the Northwestern Hawaiian Islands. *Atoll Research Bulletin* 543: 471–488.
- CIESIN (2005) Center for International Earth Science Information Network Gridded Population of the World Version 3 (GPWv3): Population Grids <http://sedac.ciesin.columbia.edu/gpw>.
- Selig ER, Casey KS, Bruno JF (2010) New insights into global patterns of ocean temperature anomalies: implications for coral reef health and management. *Global Ecology and Biogeography* 19: 397–411.
- Halpern BS, Walbridge S, Selkoe KA, Kappel CV, Micheli F, et al. (2008) A global map of human impact on marine ecosystems. *Science* 319: 948–952.
- McPeters R, Barthia PA, Krueger AJ, Herman JR, Wellemeyer CG, et al. (1998) Earth Probe Total Ozone Mapping Spectrometer (TOMS) Data Products User's Guide, NASA/TP-1998-206895 .
- Clarke KR, Chapman MG, Somerfield PJ, Needham HR (2006) Dispersion-based weighting of species counts in assemblage analyses. *Marine Ecology-Progress Series* 320: 11–27.
- Anderson MJ (2001) A new method for non-parametric multivariate analysis of variance. *Austral Ecology* 26: 32–46.
- McArdle BH, Anderson MJ (2001) Fitting multivariate models to community data: A comment on distance-based redundancy analysis. *Ecology* 82: 290–297.
- Clarke KR, Somerfield PJ, Chapman MG (2006) On resemblance measures for ecological studies, including taxonomic dissimilarities and a zero-adjusted Bray-Curtis coefficient for denuded assemblages. *Journal of Experimental Marine Biology and Ecology* 330: 55–80.
- Anderson MJ, Robinson J (2003) Generalised discriminant analysis based on distances. *Australian and New Zealand Journal of Statistics* 45: 301–318.
- Anderson MJ, Willis TJ (2003) Canonical analysis of principal coordinates: A useful method of constrained ordination for ecology. *Ecology* 84: 511–525.
- Clarke KR, Gorley RN (2006) PRIMER v6: User manual/Tutorial. PRIMER-E., UK: Plymouth.
- Akaike H (1973) Information theory as an extension of the maximum likelihood principle, 261–281. In: Petrov BN, Caski F, eds. *Akademiai Kiado Budapest: Proceedings, 2nd International Symposium on Information Theory*.
- Hurvich CM, Tsai CL (1989) Regression and time-series model selection in small samples. *Biometrika* 76: 297–307.
- Burnham KP, Anderson DR (2004) Multimodel inference - understanding AIC and BIC in model selection. *Sociological Methods & Research* 33: 261–304.
- Anderson MJ, Gorley RN, Clarke KR (2008) PERMANOVA+ for PRIMER: Guide to software and statistical methods. PRIMER-E., UK: Plymouth.
- Williams GJ, Work TM, Acby GS, Knapp IS, Davy SK (2011) Gross and microscopic morphology of lesions in *Cnidaria* from Palmyra Atoll, Central Pacific. *Journal of Invertebrate Pathology* 106: 165–173.
- Work TM, Acby GS, Coles SL (2008) Distribution and morphology of growth anomalies in *Acropora* from the Indo-Pacific. *Diseases of Aquatic Organisms* 78: 255–264.
- Raymundo IJH, Harvell CD, Reynolds TL (2003) *Porites* ulcerative white spot disease: description, prevalence, and host range of a new coral disease affecting Indo-Pacific reefs. *Diseases of Aquatic Organisms* 56: 95–104.
- Vargas-Angel B, Wheeler B (2009) Coral health and disease assessment in the US Pacific territories and affiliated states. Ft. Lauderdale Florida: Proceedings of the 11th International Coral Reef Symposium. pp 175–179.
- Bythell JC, Sheppard C (1993) Mass mortality of Caribbean shallow corals. *Marine Pollution Bulletin* 26: 296–297.
- Aronson R, Precht WF (1997) Stasis, biological disturbance, and community structure of a Holocene coral reef. *Paleobiology* 23: 326–346.

62. Palmer CV, Gates RD (2010) Skeletal eroding band in Hawaiian corals. *Coral Reefs* 29: 469–469.
63. Aeby GS (1992) Interaction between coral parasites and coral-feeding Butterflyfish. *Bulletin of the Ecological Society of America* 73: 95.
64. Aeby GS (1998) A digenean metacercaria from the reef coral, *Porites compressa*, experimentally identified as *Podocotyloides stenometra*. *Journal of Parasitology* 84: 1259–1261.
65. Cheng TC, Wong AK (1974) Chemical, histochemical and histopathological studies on corals, *Porites* spp., parasitized by trematode metacercariae. *Journal of Invertebrate Pathology* 23: 303–317.
66. Bray R, Cribb T (1989) Digeneans of the family Opcoelidae Ozaki, 1925 from the southern Great Barrier Reef, including a new genus and three new species. *Journal of Natural History* 23: 249–473.
67. Lafferty KD (1997) Environmental parasitology: what can parasites tell us about human impacts on the environment. *Parasitology Today* 13: 251–255.
68. Aeby GS (2007) Spatial and temporal patterns of *Porites* trematodiasis on the reefs of Kaneohe Bay, Oahu, Hawaii. *Bulletin of Marine Science* 80: 209–218.
69. Jokiel PL, Rodgers KS (2007) Ranking coral ecosystem “health and value” for the islands of the Hawaiian Archipelago. *Pacific Conservation Biology* 13: 60–68.
70. Hunter C, Evans C (1995) Coral reefs in Kaneohe Bay, Hawaii: two centuries of western influence and two decades of data. *Bulletin of Marine Science* 57: 501–515.
71. Aeby GS (1991) Behavioral and ecological relationships between a parasite and its hosts. *Pacific Science* 45: 263–269.
72. Aeby GS (1993) The potential effect the ability of a coral intermediate host to regenerate may have had on the evolution of its association with a marine parasite. Guam: Proceedings of the 7th International Coral Reef Symposium. pp 809–815.
73. Burke L, Selig ER, Spalding M (2002) Reefs at risk in Southeast Asia. Washington DC: World Resources Institute. 72 p.
74. Kaczmarek L, Richardson LL (2007) Transmission of growth anomalies between Indo-Pacific *Porites* corals. *Journal of Invertebrate Pathology* 94: 218–221.
75. Aeby GS, Williams GJ, Franklin E, Haapkyla J, Harvell CD, et al. (2011) Growth anomalies on the coral genera *Acropora* and *Porites* are strongly associated with host density and human population size across the Indo-Pacific. *PLoS ONE* 6(2): e16887.
76. Coles SL, Seapy DG (1998) Ultraviolet absorbing compounds and tumorous growths on acroporid corals from Bandar Khayran, Gulf of Oman, Indian Ocean. *Coral Reefs* 17: 195–198.
77. Stimson J (2011) Ecological characterization of coral growth anomalies on *Porites compressa* in Hawaii. *Coral Reefs* 30(1): 133–142.
78. Domart-Coulon JJ, Traylor-Knowles N, Peters E, Elbert D, Downs CA, et al. (2006) Comprehensive characterization of skeletal tissue growth anomalies of the finger coral *Porites compressa*. *Coral Reefs* 25: 531–543.
79. Bak RPM (1983) Neoplasia, regeneration and growth in the reef-building coral *Acropora palmata*. *Marine Biology* 77: 221–227.
80. Yamashiro H, Oku H, Onaga K, Iwasaki H, Takara K (2001) Coral tumors store reduced levels of lipids. *Journal of Experimental Marine Biology and Ecology* 265: 171–179.
81. Yamashiro H, Yamamoto M, van Woesik R (2000) Tumor formation on the coral *Montipora informis*. *Diseases of Aquatic Organisms* 41: 211–217.
82. Kenyon J, Wilkinson C, Aeby GS (2010) Community structure of hermatypic corals at Midway Atoll in the Northwestern Hawaiian Islands: A legacy of human disturbance. *Atoll Research Bulletin* 581: 1–24.
83. Kenyon J, Aeby GS, Brainard R, Chojnacki J, Dunlap M, et al. (2006) Mass coral bleaching on high-latitude reefs in the Hawaiian Archipelago. *Proceedings of the 10th International Coral Reef Symposium*. pp 631–643.
84. Kenyon J, Brainard R (2006) Second recorded episode of mass coral bleaching in the Northwestern Hawaiian Islands. *Atoll Research Bulletin* 543: 505–523.
85. Lloyd-Smith JO, Cross PC, Briggs CJ, Daugherty M, Getz WM, et al. (2005) Should we expect population thresholds for wildlife disease? *Trends in Ecology & Evolution* 20: 511–519.
86. Brandt ME, McManus JW (2009) Disease incidence is related to bleaching extent in reef-building corals. *Ecology* 90: 2859–2867.
87. Muller EM, Rogers CS, Spitzack AS, van Woesik R (2008) Bleaching increases likelihood of disease on *Acropora palmata* (Lamarck) in Hawksnest Bay, St John, US Virgin Islands. *Coral Reefs* 27: 191–195.
88. Dalton S, Godwin S, Smith SDA, Pereg A (2010) Australian subtropical white syndrome: a transmissible, temperature-dependent coral disease. *Marine and Freshwater Research* 61: 342–350.
89. Denner EBM, Smith GW, Busse HJ, Schumann P, Narzt T, et al. (2003) *Aurantimonas corallicida* gen. nov., sp nov., the causative agent of white plague type II on Caribbean scleractinian corals. *International Journal of Systematic and Evolutionary Microbiology* 53: 1115–1122.
90. Richardson LL (2004) Black band disease. In: Rosenberg E, Loya Y, eds. *Coral Health and Disease*. Berlin: Springer-Verlag. pp 325–336.
